# Supplementary material for: Trends and projections of universal health coverage indicators in Ghana, 1995-2030: A national and subnational study
Source: PLOS journal article supplement (doi:10.1371/journal.pone.0209126), 2019-05-22
Supplement: S19 (10.1371/journal.pone.0209126.s019) [file journal.pone.0209126.s019]

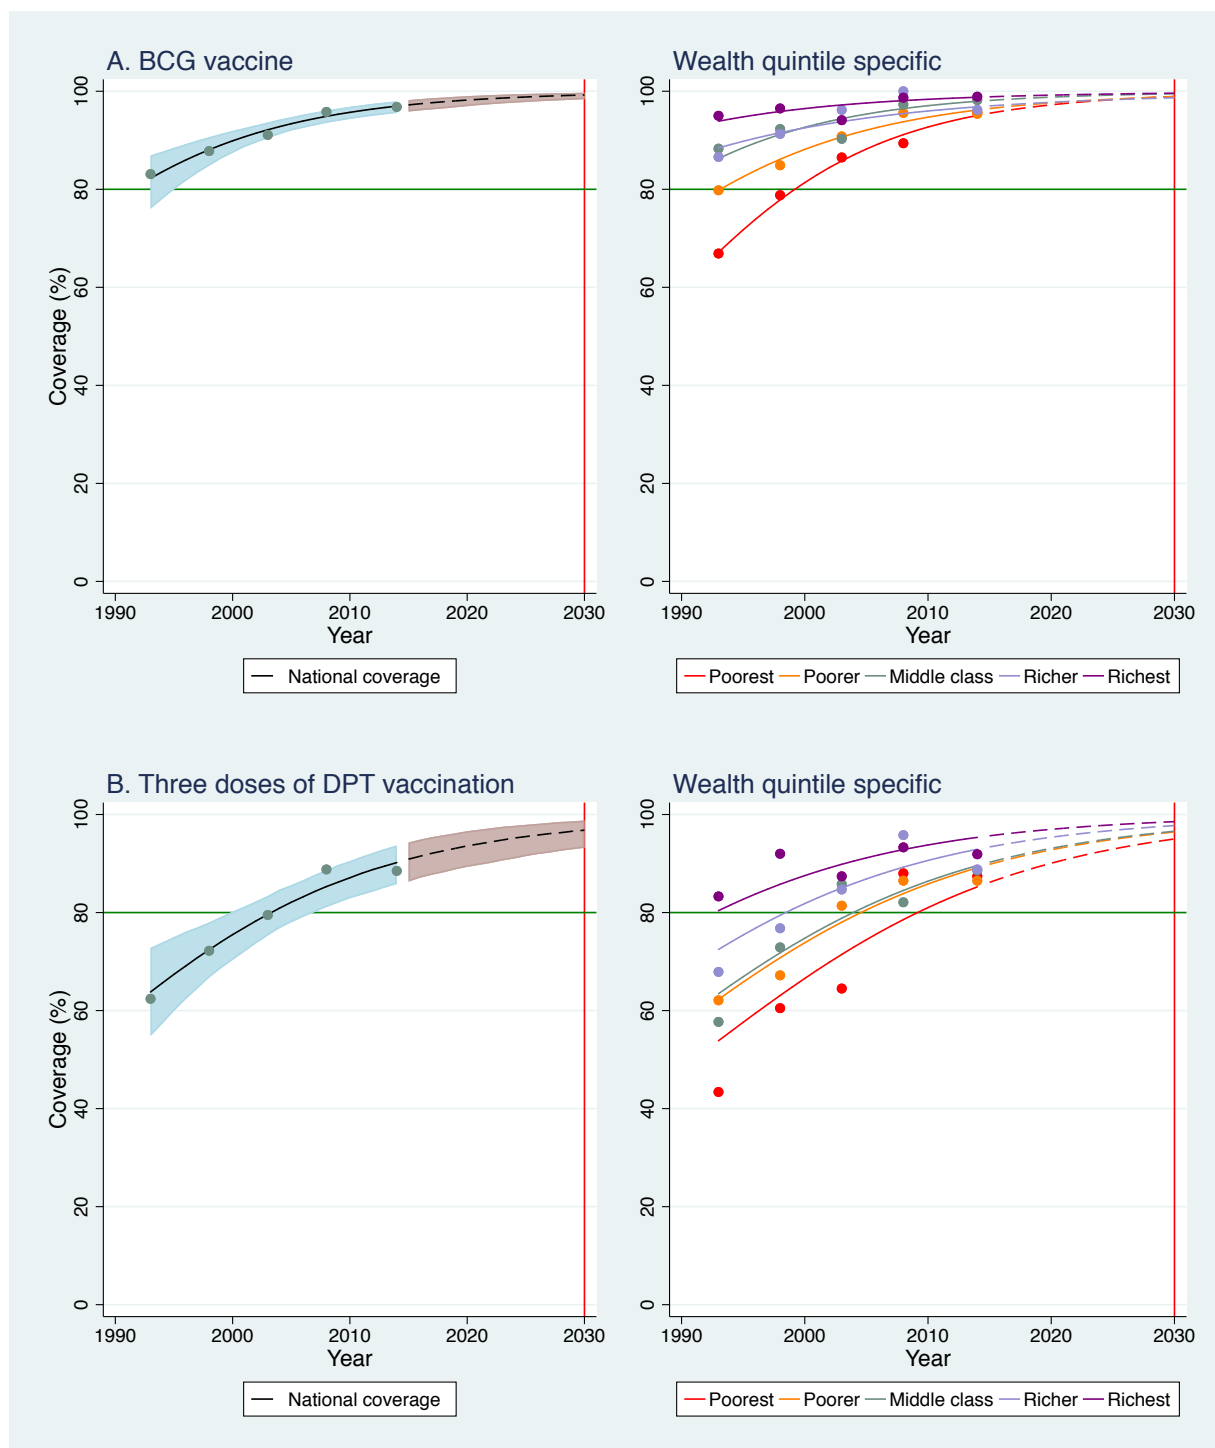

**S7 Fig: Trends and projections of the coverage of BCG and DPT vaccination in Ghana, 1993-2030**

Note: (A) Coverage of BCG vaccination (B) Coverage of three doses of DPT vaccination

The figures on the left panel represent national coverage, and the figures on the right panel show coverage across wealth quintiles. The dots indicate observed estimates from raw data. The lines show the posterior mean estimates (dashed line for projected values for future); the shaded area shows the 95% credible intervals
